# Supplementary material
Source: Elsevier journal article supplement (https://www.sciencedirect.com/science/article/pii/S0213911118300918)
Supplement: mmc1 [file S0213911118300918:mmc1.pdf]

Fraser Brockington. Informe sobre la organización de los servicios sanitarios en España, 1967. © World Health Organization, 1967. Traducido del francés por Esteban Rodríguez Ocaña © Universidad de Granada, 2018

INFORME SOBRE LA ORGANIZACIÓN DE LOS SERVICIOS SANITARIOS EN ESPAÑA\*. Misión ejecutada entre el 28 de septiembre y el 17 de diciembre de 1967. Por el Dr. Fraser Brockington<sup>1</sup>, consultor de la OMS en Administración de Salud Pública [Original publicado en francés por la Oficina Regional Europea de la OMS con el título "Rapport sur l'organisation des services de santé en Espagne, Mission effectuée du 28 septembre au 17 décembre, par le Dr. Fraser Brockington". © World Health Organization, 1967. El traductor se hace responsable de la exactitud de la traducción. © Universidad de Granada, 2018]

## SUMARIO

|                                                                        | Página |
|------------------------------------------------------------------------|--------|
| Glosario                                                               | 2      |
| 1 INTRODUCCIÓN                                                         | 3      |
| 2 LEY DE SANIDAD                                                       | 4      |
| 2.1 Debilidades de la Ley de Bases                                     | 4      |
| 2.2 Debilidades derivadas de la falta de aplicación de la Ley de Bases | 5      |
| 3 ADMINISTRACIÓN Y EJECUCIÓN                                           |        |
| 3.1 Dirección General de Sanidad                                       | 6      |
| 3.2 Seguridad Social                                                   | 7      |
| 3.3 Laboratorios                                                       | 7      |
| 3.4 Servicio de Estadística                                            | 8      |
| 4 LA ESTRUCTURA SANITARIA                                              |        |
| 4.1 Generalidades                                                      | 9      |
| 4.2 Debilidades estructurales                                          | 10     |
| 4.2.1 Falta de autoridad del Jefe provincial                           | 10     |
| 4.2.2 Escasez de personal en el nivel provincial                       | 10     |
| 4.2.3 Falta de trabajadores de campo                                   | 11     |
| 4.2.3.1 Vigilancia medioambiental                                      | 11     |
| 4.2.3.2 Servicios de Enfermería de Salud Pública                       | 11     |
| 4.2.4 Ausencia de Código sanitario                                     | 12     |
| 4.2.5 Abuso del empleo a tiempo parcial                                | 13     |
| 4.2.6 Insuficiente enseñanza de Salud Pública                          | 13     |
| 5 FORMACIÓN DEL PERSONAL DE SALUD PÚBLICA                              |        |
| 5.1 Formación en Medicina                                              |        |
| 5.1.1 Enseñanza universitaria                                          | 13     |
| 5.1.2 Enseñanza post-universitaria                                     | 14     |
| 5.1.3 Proyecto universitario piloto en Medicina Preventiva y Social    | 16     |
| 5.2 Formación en Estadística sanitaria                                 | 16     |
| 5.3 Formación en Enfermería de Salud Pública                           | 17     |
| 5.4 Formación de Agentes sanitarios                                    | 17     |
| 5.5 Instituto Técnico de Sanidad                                       | 17     |
| 5.6 La zona de demostración                                            | 18     |
| 6 RECOMENDACIONES                                                      |        |
| 6.1 Reorganización de la administración sanitaria                      | 19     |
| 6.1.1 Nivel central                                                    | 19     |
| 6.1.2 Nivel provincial                                                 | 19     |
| 6.2 Formación del personal                                             | 20     |
| 7 SUGERENCIAS SOBRE LA AYUDA ACTUAL Y FUTURA POR PARTE DE LA OMS       | 20     |

\* *Nota del traductor:* se respeta la tipografía del escrito original. Las notas son las que figuran en el original, salvo otra especificación.

<sup>1</sup> Ex profesor de Medicina Preventiva y Social en la Universidad de Manchester.

Fraser Brockington. Informe sobre la organización de los servicios sanitarios en España, 1967. © World Health Organization, 1967. Traducido del francés por Esteban Rodríguez Ocaña © Universidad de Granada, 2018 2

## GLOSARIO

### Ambulatorio

Dispensario de atención de la Seguridad Social. Muchos son establecimientos de gran tamaño que incluyen consultas médicas generales y de todas las especialidades existentes. Su función se explica en el texto (p. 8).

### Cuerpo de Sanidad Nacional

Cuerpo [de la administración] compuesto de médicos, veterinarios y farmacéuticos que han debido superar un examen especial.

### Escuela Nacional de Sanidad

Instalada como parte de la Universidad de Madrid pero bajo el control del Ministerio de la Gobernación. Nos interesa resaltar que organiza dos tipos de cursos:

-Curso de Diplomado en Sanidad, de cuatro meses de duración con un examen final. Cursos similares se organizan en otras provincias fuera de Madrid por escuelas provinciales en relación con las universidades, de donde proceden los enseñantes. Este curso básico de Salud Pública permite a los médicos, veterinarios y farmacéuticos aspirar a una plaza oficial además de mantener su práctica privada.

-Curso de Oficiales Sanitarios, para los funcionarios que han superado el curso de Diplomado y acceden a través de un examen de ingreso. La enseñanza incluye un semestre en la Escuela, una estancia de otro semestre y un semestre de preparación de una tesis, los dos últimos se pueden realizar en el lugar donde el funcionario desempeña su trabajo.

### Jefatura Provincial de Sanidad

Dirección provincial del servicio sanitario, a cuya cabeza está el Jefe provincial. En el texto se la refiere indistintamente como Jefatura o Jefe.

### Ley de Bases de Sanidad Nacional

Ley fundamental de Salud Pública de 1944, denominada en el texto “Ley de Bases” o “Ley”.

### Mancomunidad

Grupo de municipios o provincias asociados en la realización de una tarea común o en la administración de servicios.

### Médico titular

Médico que, a la vez que ejerce su consulta particular, es nombrado a tiempo parcial por la Dirección General para ejercer determinadas tareas bajo las órdenes de la Jefatura provincial (ver capítulo 4.1). El calificativo de titular se aplica en el mismo sentido a los restantes funcionarios sanitarios. A veces se llama “Jefe local” al médico titular responsable de un sector.

### Patronatos

Asociaciones nacionales cuya actividad cubre una rama de los servicios sanitarios como tuberculosis o salud mental, por ejemplo. Desde un punto de vista administrativo y económico tienen mayor libertad de acción que un servicio oficial, aunque están sometidas a una vigilancia estrecha por la Dirección General de Sanidad.

### Practicante

Ayudante médico que recibe una enseñanza de tres años de duración y ejerce funciones similares a las de un enfermero.

## 1. INTRODUCCIÓN

La finalidad de mi misión era proporcionar consejo sobre la organización de las actividades de Salud Pública y, en particular, sobre los cinco puntos siguientes:

- 1) lugar y funciones de los Institutos Provinciales de Sanidad y posibilidad de establecer un Instituto Nacional de Sanidad;
- 2) organización y desarrollo de una zona de demostración;
- 3) principios de la organización hospitalaria;
- 4) formación de personal en Salud Pública;
- 5) organización de una sección de higiene y estadística en la Dirección General de Sanidad.

A estos efectos tuve discusiones profundas en la Dirección General de Sanidad en Madrid (en lo que sigue, “Dirección General”), con el Director y la práctica totalidad del personal de dirección, en los Patronatos, en la Escuela Nacional de Sanidad, en la Facultad de Medicina de Madrid, en el Instituto Nacional de Estadística, en la administración central de la Seguridad Social, en diversas escuelas de enfermería o practicantes, en suma en una serie de organismos diversos. Otras visitas y discusiones se han realizado igualmente en numerosas administraciones e instituciones de las provincias de Ávila, Ciudad Real, Granada, Jaén, Madrid, Palencia, Toledo y Valencia, así como en el Colegio de la Administración de Alcalá de Henares. Vaya por delante toda nuestra gratitud para todos aquellos que nos han ayudado en estas tareas, que son demasiado numerosos para citarlos.

Este informe, redactado tras un estudio de tres meses en España, aparece en un momento crítico cuando el desarrollo del país, que engloba de forma creciente a los servicios sanitarios, se realiza a un ritmo rápido dentro de unas estructuras envejecidas.

El pueblo español, heredero de una larga tradición cultural, entusiasta y consciente de sus responsabilidades, con un excelente sistema de enseñanza y un servicio médico altamente desarrollado, es muy capaz de asimilar los principios de la medicina social y preventiva que, en la actualidad, brillan por su ausencia.

Estos problemas son objeto de discusión desde hace tiempo en los medios profesionales, la gran prensa y las revistas médicas.

En 1965, el Ministerio de la Gobernación ha publicado un “Plan de Actividades Sanitarias”, que examinaba la situación y las necesidades de los servicios sanitarios españoles, sugería un plan de renovación de las estructuras y presentaba un proyecto de ley. Este documento (246 páginas, de 45x32 cm) que funda su argumentación sobre premisas que son comunes a la mayor parte de las Escuelas de Salud Pública, si bien adaptadas a las circunstancias particulares de la vida y la cultura españolas, reviste gran importancia.

En 1964, la Organización Mundial de la Salud inició conversaciones con el Gobierno sobre la creación de una zona de demostración que serviría de modelo para la estructura sanitaria provincial a la vez que se convertiría en lugar de investigación sobre los problemas de salud y de formación sobre el terreno.

Por lo tanto, existen bases excelentes para una acción de futuro.

La estructura actual de los servicios sanitarios es insuficiente para asumir la pesada tarea de renovar la medicina preventiva y curativa, tanto a nivel nacional como provincial, en el centro como en la periferia; mucho de lo que se hace escapa al control de la Dirección General de Sanidad y sin embargo mucho se descuida.

Además se genera cierto desorden dado que el crecimiento vigoroso de las ideas nuevas que aparecen en España sobre la naturaleza y las funciones de los servicios sanitarios se acompaña de cambios y adaptaciones heterogéneas en el interior de un marco jurídico envejecido.

Tal es la situación en la que se encuentra España y no hay que escatimar esfuerzos para vencer las dificultades estructurales que obstaculizan la reforma de los servicios establecidos. Urge ahora poner remedio a esta situación si se quiere que las generaciones futuras obtengan el mayor beneficio de los esfuerzos y gastos actuales.

Hace falta una reorganización en los cuatro aspectos fundamentales siguientes:

- ley de Salud Pública
- administración sanitaria
- estructura sanitaria
- formación de personal de Salud Pública

## 2. LA LEY DE SANIDAD

Según la vigente Ley de Bases, la responsabilidad de los servicios de salud corresponde al Ministerio de la Gobernación a través de la Dirección General de Sanidad.

El hecho de no haberse creado un Ministerio de Sanidad a la vez que la Ley o después, ha impedido que la medicina, en especial la preventiva, haya hecho oír su voz tanto como es conveniente en el gobierno de la nación; en consecuencia, cierto número de responsabilidades en materia de salud han sido confiadas a otros ministerios y a otras autoridades, lo que debilita a la Dirección General. No obstante, por inconveniente que sea, la ausencia de ministerio propio no debería ser obstáculo para el desarrollo de un servicio sanitario eficaz.

La Ley de Bases preveía la creación de una red muy completa de servicios sanitarios, donde apenas se omitía nada. Así, por ejemplo, establecía institutos de salud unidos a las Jefaturas provinciales, con función de órganos centrales de las actividades administrativas, clínica y de laboratorio en el terreno de la Salud Pública. Las funciones del Instituto de Sanidad situado en cada capital de provincia se enumeran de la siguiente forma:

- Higiene internacional
- Epidemiología
- Análisis de laboratorio de higiene
- Protección materno-infantil y escolar
- Tuberculosis
- Dermatología e higiene social
- Servicios veterinarios
- Especialidades clínicas relacionadas con las anteriores secciones
- Hematología
- Saneamiento e higiene de la vivienda
- Desinfección y desinsectación
- Transporte de enfermos

La Ley de Bases preveía también, en ciudades de cierta importancia de cada provincia, la creación de Centros Secundarios con las citadas funciones bien que a escala menor.

Pese al carácter tan completo de la Ley de Bases, y ciertamente para sorpresa de los legisladores de la época, los servicios creados por ella han manifestado evidentes debilidades, algunas dependientes de la propia ley, otras derivadas de la falta de concreción de las intenciones de los legisladores.

### 2.1. Debilidades de la Ley de Bases

Las principales debilidades de la ley son las siguientes:

a) Creación de un Patronato separado para la tuberculosis y, por un decreto posterior, otro para la salud mental. Aunque responsables ante el Director General, los patronatos funcionan como unidades independientes, de modo que el Patronato de la Tuberculosis emplea a un coordinador propio a nivel provincial y posee sus propias enfermeras, especialmente entrenadas en el trabajo de campo. En la práctica, los inconvenientes de esta fragmentación se limitan por un alto grado de coordinación a escala central y periférica. Pero en materia de administración de salud pública la coordinación no reemplaza la unificación y confiar demasiado en sus virtudes es siempre peligroso para el desarrollo futuro.

b) Creación de “imperios” en los terrenos de la veterinaria y la farmacia

El sistema administrativo, tanto central como periférico, reposa desde un punto de vista profesional en tres ejes: medicina, farmacia y servicios veterinarios, lo que disminuye la influencia de la medicina preventiva y social en tanto que principio general de actuación.

c) Falta de precisión en la definición de responsabilidades y funciones del jefe provincial

Esta laguna, como se verá más adelante, es una de los principales motivos de debilidad estructural.

## 2.2. Debilidades derivadas de la falta de aplicación de la Ley de Bases

Los principales puntos débiles que produce la falta de implementación de la Ley se producen en ámbitos como los siguientes:

a) Higiene del medio

La ley estipulaba que la Dirección General de Sanidad tendría la responsabilidad del saneamiento e higiene de las viviendas, lo que en la actualidad sólo rige para construcciones de nueva planta. La razón de esta grave deficiencia es que no existe legislación apropiada, salvo el decreto nº 2414 de 1961<sup>2</sup>, de aplicación a la industria, en lo que compete a saneamiento; al mismo tiempo, tampoco existe personal asignado, salvo para el cobro de las tasas reglamentarias.

b) Enseñanza de la higiene

La ley creaba la Escuela de Sanidad con una triple función, de enseñanza, investigación y supervisión general de las actividades epidemiológicas –un concepto llamativo en si mismo, pero que no ha sobrevivido dada la ausencia de apoyo. No se ha nombrado al personal necesario para esta tarea y nunca ha funcionado el órgano de dirección.

c) Estadísticas

La Ley estipulaba que los médicos y demás personal que trabajara en los servicios sanitarios debería suministrar datos estadísticos, al considerarse estos como un elemento esencial para el triunfo de toda planificación sanitaria. También en este terreno los resultados han sido pobres; tanto a nivel central como periférico, los datos que se recogen se limitan principalmente a las enfermedades de declaración obligatoria; no existen ni directivas precisas ni personal para la conservación de archivos.

No sólo no se ha aplicado la Ley para completar la estructura administrativa de la Dirección General de Sanidad, como estaba previsto, sino que la situación se ha agravado ante el hecho de que algunas actividades dependen de otras manos y caen bajo la responsabilidad de otros ministerios. Es lo que ocurre con la higiene ambiental que, en la medida en que se efectúa, depende preferentemente de los Ministerios de Turismo, Vivienda y Obras públicas antes que de la Dirección General de Sanidad; la salud escolar forma parte de las funciones del Ministerio de Educación; los hospitales y ambulatorios se desarrollan a un ritmo rápido bajo la jurisdicción del Ministerio de Trabajo. Uno de los efectos desastrosos de tal proliferación de servicios que escapan al control de la DGS es que debilitan más a los Jefes provinciales.

Queda fuera de duda que una solución siquiera parcial podría aportarse a estas deficiencias a través de decretos o reglamentos emitidos en el marco de la Ley de Bases. Vistas las numerosos y variadas complicaciones existentes así como el lapso de tiempo transcurrido desde que se dictaron los últimos preceptos, lo urgente es elaborar una nueva ley de Sanidad que 1) pusiera a todos los servicios de salud bajo una única jurisdicción, 2) unificara y extendiera las funciones ejecutivas al escalón periférico, 3) definiera las responsabilidades de los jefes provinciales y locales en lo tocante a higiene ambiental, 4) previera la elaboración de un Código sanitario puesto al día y 5) levantara una infraestructura eficaz.

La nueva ley, como condición previa a una buena planificación y desarrollo de los servicios de salud, por poco que sea bien pensada, debería permitir que los servicios sanitarios españoles alcanzaran rápidamente un nivel idéntico al de otros existentes en Europa y en otros lugares del mundo.

<sup>2</sup> Decreto 2414/1961, de 30 de noviembre, de Presidencia del Gobierno, por el que se aprueba el Reglamento de actividades molestas, insalubres, nocivas y peligrosas. (Vigente hasta el 17 de noviembre de 2007) «BOE» núm. 292, de 7 de diciembre de 1961, páginas 17259 a 17271. CORRECCIÓN de errores en BOE núm. 57, de 7 de marzo de 1962 (Ref. BOE-A-1962-4488). *Nota del editor.*

### 3. ADMINISTRACIÓN Y EJECUCIÓN

#### 3.1 Dirección General de Sanidad

Una de las tareas más difíciles en materia de Salud Pública es establecer unas relaciones satisfactorias entre los órganos centrales y los periféricos; hay que evitar, por un lado, una centralización excesiva que impida cualquier iniciativa a las unidades periféricas y las prive de su facultad de aplicar técnicas concretas o peculiares a sus problemas propios y, por otro, la descentralización tal que suprima todas las ventajas que sólo poseen las organizaciones que tienen gran envergadura.

Se trata de un problema administrativo que no es de fácil solución y es inevitable que el equilibrio adoptado esté en relación con la concepción propia de cada país. De todas formas, se acepta generalmente que la administración central debe responsabilizarse de: 1) la política general en materia de salud, incluido el nombramiento del personal en los puestos clave y las grandes transformaciones estructurales, 2) el presupuesto, 3) la inspección y 4) los servicios especializados de consulta; mientras que la administración periférica debe asumir las tareas y decisiones ejecutivas diarias, ocuparse del conjunto de los problemas relevantes en su jurisdicción y poseer la suficiente autoridad como para crear servicios destinados a responder a las necesidades específicas de la región.

El tamaño óptimo de una circunscripción administrativa periférica depende de las condiciones industriales, geográficas, demográficas y epidemiológicas. Si la población sobrepasa los 150 a 200.000 habitantes, la unidad periférica debe poseer una o varias subdivisiones dotadas de su correspondiente delegación de poderes.

¿En qué se reconoce “esencialmente” que un problema sanitario depende de la autoridad central? Se trata de una cuestión muy debatida. Hay siempre sectores que, en todos los países, dependen de servicios distintos del de Sanidad. Sin embargo, se podría alcanzar un acuerdo unánime acerca de un mínimo de atribuciones que incluyeran el control de los hospitales y los servicios de especialidades que dependan de ellos, incluida la coordinación con instituciones privadas, el control del ejercicio médico y asuntos concomitantes, así como todas las formas de intervención en salud pública incluida la higiene ambiental.

La administración de la Salud Pública en España peca contra estos principios básicos en múltiples aspectos:

- a) El escalón central carece de jurisdicción sobre el conjunto de elementos mínimos indicados arriba, en particular se le escapa la autoridad sobre hospitales e higiene ambiental. La creación de hospitales y de ambulatorios por parte de la Seguridad Social cobra tal amplitud en la actualidad que su movimiento sobrepasa en importancia las atribuciones de la Dirección General de Sanidad. El control de la higiene ambiental, repartido entre varios ministerios, da la impresión de estar bajo la vigilancia de todos y por ello en general se le descuida.
- b) El escalón central ejerce pocas o relativamente pocas funciones inspectoras, sin las cuales no pueden evaluarse ni la eficacia de los servicios, ni su modo de funcionamiento ni su rentabilidad. La causa principal es que el escalón central ha sido incapaz de delegar su autoridad en el escalón periférico en lo que concierne a los detalles de la administración diaria.
- c) El escalón central se esfuerza poco o nada por coordinar su política. No existe un diálogo habitual entre los distintos Ministerios, lo que les permitiría revisar las líneas generales de la política. Cada departamento ministerial tiende a seguir aisladamente su propio camino.
- d) Las funciones de centro y periferia no están bien definidas. A la administración central revierten demasiadas cuestiones que debían resolverse a nivel local.
- e) La responsabilidad de los Jefes provinciales no queda bien definida, es demasiado pequeña y no basta para garantizar una protección adecuada de la salud de la comunidad.
- f) No existen subdivisiones en provincias que son demasiado extensas para contar con un único centro administrativo.

g) El sistema de empleo para los médicos es inadecuado y favorece el “pluralismo” (*pluriempleo*), disminuye las responsabilidades particulares y se apoya en demasía en la integridad profesional. Esto produce en general una limitación de la eficacia administrativa en todos los escalones.

### 3.2 Seguridad Social

Una política decidida en materia de hospitales, ambulatorios y servicios de cuidados a domicilio en el marco de las Cajas del seguro administradas por la Seguridad Social dependientes del Ministerio de Trabajo ha creado en un lapso de tiempo relativamente breve un dispositivo de atención médica totalmente nuevo en España. En los distritos rurales, es decir en la mayor parte del país, la Seguridad Social, mediante los médicos de pueblo, ha integrado la atención médica (del Seguro) dentro de los servicios preventivos organizados y financiados por la DGS. Conociendo las reservas formuladas antes sobre la endeblez de la estructura, en particular sobre la falta de enfermeras visitadoras y otros trabajadores sociales, esta integración es de lo más extraordinario. Pero, desgraciadamente, no ha progresado; así, en las ciudades, la creación de ambulatorios, independientes de los Institutos Provinciales de Sanidad, ha producido un solapamiento de servicios. La atención médica asegurada por la Seguridad Social comprende buena parte de la prevención primaria y secundaria, lo que en si mismo es estimable; tal es el caso de los servicios pediátricos que atienden a los hijos de las familias aseguradas, a domicilio o en ambulatorio, y emplean a estos efectos pediatras generalistas, lo que se superpone a los servicios preventivos de los Institutos Provinciales. Los servicios prestados desde los ambulatorios, que llevan la atención médica a niños y adultos a sus domicilios (de común acuerdo con los servicios organizados por los Institutos sanitarios) están mal servidos en lo tocante a trabajadores sociales indispensables; por otra parte, sufren por la insuficiente formación en materia de Medicina Preventiva y Social. Pero al menos materializan las ideas modernas de unificación de la medicina preventiva y curativa en la prestación a domicilio. Sólo quedaría suprimir sin demora la división artificial entre ambos dispositivos.

En el terreno de la construcción de nuevos hospitales, en la medida en que dependen de dos Ministerios, también se han presentado problemas graves. El Ministerio de Trabajo, que tiene dinero o puede obtenerlo con mayor facilidad, tiene un ritmo de construcción muy rápido y construye la mayor parte de los hospitales modernos; pero se concentran sobre todo en la vertiente quirúrgica. Los hospitales generales para enfermos agudos y crónicos, como también los hospitales psiquiátricos y otros hospitales especializados dependen casi exclusivamente del Ministerio de la Gobernación. Este reparto de responsabilidades es artificial y dañino de cara a una política racional. Tal división de poderes hace especialmente difícil, si no imposible, cosas como las siguientes:

- el equilibrio de gastos entre los dos ámbitos principales de la medicina, la prevención y la curación;
- la armonización de las relaciones de trabajo entre hospitales de distinto tipo;
- el establecimiento de un programa mínimo para conseguir la eficacia hospitalaria.

Las disposiciones vigentes dan la apariencia de que ambos servicios de salud nacionales funcionan independientemente uno de otro, a la vez que compiten entre sí, lo que merma su eficacia. Urge con premura resolver esta situación. La solución más simple sería crear un Ministerio de Sanidad que englobara a la Seguridad Social.

### 3.3 Laboratorios

El servicio de laboratorios de Sanidad se ha constituido poco a poco dentro de los Institutos provinciales de Sanidad con la finalidad de realizar los análisis relativos a la higiene y el saneamiento como se estipulaba en la Ley de Bases. Se ha desarrollado en tres vertientes (médica, veterinaria y farmacéutica) según las divisiones administrativas inscritas en la Ley. El sentido común y una gestión prudente sin duda han ayudado a sobreponerse a lo peor ante las dificultades de manejar un laboratorio dividido en tres partes. Por ejemplo, los límites

artificiales impuestos entre los análisis de alimentos de origen animal y los de origen vegetal o mineral no siempre se han respetado. El personal y el equipamiento se han puesto en común. Sin embargo, pese a todas las ventajas que pudiera reportar al principio la existencia de iniciativas locales que actuaban de forma diferente en las tres divisiones, es más cierto que cualquier progreso exige la revisión de todo el sistema. Lo que sería deseable hoy es la creación de un laboratorio central de Salud Pública, con laboratorios periféricos unificados en cada provincia que tuvieran entre sus atribuciones los trabajos relativos a la higiene ambiental.

El futuro director de este laboratorio central de salud pública debería ser oído de cara a la construcción de un servicio nacional eficaz.

### 3.4 Servicio de Estadística

La eficacia de un servicio de salud depende del conocimiento que se tenga sobre las anomalías existentes en materia de salud, de los factores que las causan, de los medios que se poseen para hacerles frente (y si fuera posible prevenirlas o atenuarlas) y de su reparto geográfico. Este conocimiento constituye la base de la Epidemiología y de la Estadística; pero para disponer de los datos necesarios, es preciso que existan los departamentos estadísticos eficaces en el interior de los servicios sanitarios, encargados de recogerlos y analizarlos.

Sobre estos extremos insistía la Ley de Bases; mas, por razones diversas, parece que este sistema nunca llegó a ver el día. Existe un Instituto Nacional de Estadística que explota los datos de nacimientos y muertes de todo el país. Las estadísticas de mortalidad se basan sobre la certificación médica obligatoria. Por desgracia, este sistema de diseño admirable no consigue proporcionar una representación exacta de las causas de muerte debido a que una elevada proporción de tales certificaciones no se ajustan a las reglas básicas precisadas por la OMS. De este hecho, junto con otras observaciones, se deduce que no se enseña, o bien se hace de manera insuficiente, a los estudiantes y que estos no advierten el papel esencial que la figura del médico juega para el establecimiento de un cuadro estadístico exacto de la salud en España.

Durante los últimos tiempos se ha acumulado un volumen impresionante de datos en determinados servicios, en particular por el Patronato de Tuberculosis y por el Instituto de Oncología. Estas aportaciones preciosas rellenan de manera significativa lo que de otro modo se vería como un desierto estadístico.

En el escalón central, en la DGS no existe ningún departamento encargado de la colección general de datos estadísticos, aparte de la sección de Epidemiología que se limita principalmente a los datos relativos a las enfermedades de declaración obligatoria.

A nivel periférico existen departamentos de Epidemiología en las Jefaturas que se emplean más o menos en recoger datos sobre distintas cuestiones sanitarias, fuera de las enfermedades de declaración obligatoria; pero su personal es de los más escasos. No existen estadísticos cualificados.

La manera de remediar estas debilidades en el sistema administrativo sería, para empezar, la creación de un departamento eficaz de Estadística en cada Jefatura provincial. La primera medida podría ser el nombrar un jefe adjunto a tiempo completo como responsable del mismo en lugar del médico epidemiólogo actual, que generalmente está empleado a dedicación parcial.

A continuación habría que constituir un departamento de Epidemiología y Estadísticas dirigido por un médico administrador superior con formación especial en estadística sanitaria, como ya fue sugerido con anterioridad por un consultor de la OMS y en cuyo beneficio se han otorgado varias becas de estudio para candidatos a ocupar dicha plaza<sup>3</sup>. Este médico-estadístico acumularía sus funciones con un puesto docente en la Escuela de Sanidad.

La tercera medida consistiría en formar ayudantes estadísticos para trabajar en los servicios de estadística sanitaria, como se insiste más adelante, de modo que el nuevo instrumento de recogida de datos esté servido por personal adecuado.

<sup>3</sup> Hugo Behm Rosas (1913-2011), chileno, consultor de la OMS en Estadística sanitaria, visitó España en 1962 y en 1964, en el marco del Proyecto España-22. *Nota del editor.*



Se desplegarán todos los esfuerzos necesarios para mejorar la enseñanza dispensada a los estudiantes de medicina en esta materia, en el marco de una formación más general de Medicina Social y Preventiva. Pero no habrá manera de sacar esto adelante en tanto que no haya un profesor de Medicina Social y Preventiva a tiempo completo en al menos una de las universidades españolas.

#### 4. LA ESTRUCTURA SANITARIA

##### 4.1. Generalidades

La estructura sanitaria en España, más allá del escalón central en Madrid, descansa sobre las Jefaturas provinciales, sin intervención de autoridades regionales. El Jefe provincial, que es miembro del Cuerpo de Sanidad Nacional y está asistido por los jefes de los servicios veterinarios y farmacéuticos, quienes están en posesión de uno o ambos diplomas otorgados por la Escuela Nacional de Sanidad, es responsable del Instituto de Sanidad, cuyo personal procede originalmente de las Mancomunidades sanitarias y sólo recientemente ha sido incorporado de pleno a la Jefatura. La extensa lista de funciones asignadas a los Institutos de Sanidad por la Ley de Bases se ha visto en la práctica muy restringida; por ejemplo, la vigilancia de la vivienda (pese a que la Ley se refiere al saneamiento e higiene de las viviendas) se limita a la inspección de las nuevas construcciones y a las inspecciones reglamentarias de cara a cobrar las tasas pertinentes, lo cual carece de relación alguna con la cuestión del saneamiento. La recogida de datos encomendada a la sección de epidemiología es muy limitada ante la ausencia de personal cualificado. Básicamente no existen consultas de especialidad ni consultas para cuidado prenatal, protección de la infancia, enfermedades venéreas y enfermedades pediátricas más que en las capitales de provincia, donde con frecuencia duplican la cobertura de los ambulatorios y son eclipsados por estos. La posición del Jefe se ha visto también debilitada por la política de desarrollo hospitalario llevada a cabo por la Seguridad Social, que escapa a su autoridad.

El Jefe provincial carece de responsabilidades claramente definidas y administra la provincia sin ser secundado por médicos de distrito.

Por debajo de la Jefatura Provincial existe una red de médicos generales, veterinarios y farmacéuticos, así como de practicantes y matronas, en una gran proporción con dedicaciones a tiempo parcial. Así, por ejemplo, en la provincia de Ávila, donde residen 231.977 habitantes (1960), en 1967 existían 192 médicos titulares, 103 practicantes titulares, 29 matronas titulares, 80 veterinarios titulares y 69 farmacéuticos titulares. En Valencia (con 1.429.708 habitantes) las cifras correspondientes eran de 315, 237, 158, 129 y 122. Los médicos titulares nombrados como Jefes locales ejercen los poderes que les delegan sus Jefes Provinciales; las funciones de todos los miembros de la estructura sanitaria están recogidas en los Reglamentos aplicables al personal de los servicios de salud pública locales (1954)<sup>4</sup>. Las vacunaciones y la lucha contra las infecciones se confían a médicos y practicantes; la vigilancia de animales y la producción y venta de alimentos de origen animal, a los veterinarios; la de las cuestiones farmacéuticas y la potabilidad de las aguas y los alimentos de origen no animal, a los farmacéuticos. Las matronas, o en su ausencia los practicantes, garantizan cuidados obstétricos para los pobres. Los médicos y practicantes son, simultáneamente, empleados por la Seguridad Social para tratar a sus asegurados.

La fortaleza de esta estructura reside en la integración de la acción curativa y la acción preventiva en manos de un equipo profesional cuyos componentes son nombrados por oposición, más fácil de superar si se obtiene antes un diploma de Sanidad. O, dicho de otra manera, que existe una amplia difusión de conceptos de Salud Pública entre los médicos generales, veterinarios, farmacéuticos, practicantes y matronas, dentro de los límites de la enseñanza dispensada. El que exista un número parecido de profesionales orientados hacia la Salud Pública

---

<sup>4</sup> Decreto de 27 noviembre 1953 del Ministerio de la Gobernación, por el que se aprueba el Reglamento de personal de los Servicios Sanitarios Locales. BOE 99/1954, de 9/04/1954. *Nota del editor.*

(961 en la provincia de Valencia) proporciona una estructura sanitaria de la que se podría obtener mucho más.

Los practicantes<sup>5</sup> reciben tres años de enseñanza, similar si no idéntica (desde 1953) a las de las enfermeras, y representan una profesión masculina muy antigua, cuyo ejercicio está sometido al control de un Colegio profesional, con unas funciones (delimitadas por los Reglamentos de 1954) que se parecen mucho a las de un ayudante de médico<sup>6</sup>. Es opinión generalizada que los practicantes usurpan las tareas del médico; sea como sea, es muy difícil establecer un límite preciso entre las actividades del enfermero y las del médico; su trabajo en los distritos rurales no puede considerarse realmente como de enfermero de cuidados a domicilio. Con todo, desde una perspectiva de futuro, el practicante, en tanto que enfermero, podría reforzar en buena medida la estructura sanitaria si recibiera una formación 1) en cuidados a domicilio y 2) como visitador de salud pública y si estuviera empleado a tiempo completo en los departamentos provinciales de Sanidad. Al contrario de lo que parece desprenderse de los reglamentos, el practicante carece de responsabilidades en lo que se refiere a la higiene ambiental y cree firmemente que dicho trabajo no debería entrar en sus atribuciones profesionales.

Durante los últimos años, la creación de un sistema de Seguridad Social nacional ha afectado a la estructura sanitaria en profundidad, al desarrollar un instrumento de Medicina General independiente de la DGS y que cubre a cerca del 70% de la población. En los pueblos donde el médico es, a la vez, el titular para las funciones del Departamento provincial de Sanidad y el médico del seguro para consulta y atención a domicilio, se cumple la asociación entre la medicina preventiva y la medicina curativa de forma satisfactoria. En las ciudades donde la Seguridad Social ha construido ambulatorios, esta asociación se rompe. Al mismo tiempo, como ya se ha expuesto, los ambulatorios incluyen consultas de especialidad que se duplican con las de la Jefatura. En la mayor parte de las ciudades, lo ventajoso sería combinar ambos servicios.

#### 4.2 Debilidades estructurales

Sus principales debilidades son las siguientes: 1) falta de autoridad del Jefe provincial, 2) falta de personal a escala provincial, 3) escasez de trabajadores de campo, 4) ausencia de un código sanitario, 5) excesiva proporción de empleados a tiempo parcial, 6) enseñanza insuficiente de la Salud Pública.

##### 4.2.1 Falta de autoridad del Jefe provincial

La salud de la comunidad constituye un dominio unitario que sufre si se le descompone en sectores distintos e independientes. “La diversidad de esfuerzos y la falta de integración de los servicios son nocivos”<sup>7</sup>. Por ello, el papel fundamental del Jefe provincial debería ser “estudiar la salud de la región a la que sirve, determinar las influencias nocivas donde se produzcan, darlas a conocer y movilizar todos los esfuerzos de los que disponga para atenuarlas”<sup>8</sup>. Debería actuar hasta donde fuera posible como si la provincia fuese un país independiente del que él fuera director de los servicios sanitarios. No es este el caso de España.

##### 4.2.2 Escasez de personal en el nivel provincial

<sup>5</sup> Su número asciende a 40.000, junto con 21.000 enfermeras; existen 5 ó 6 escuelas de practicantes mientras que hay entre 60 y 70 para la enseñanza de la enfermería.

<sup>6</sup> Asistencia médico-quirúrgica gratuita; asistencia a partos normales; funciones auxiliares de carácter sanitario; servicio auxiliar en hospitales y casas de acogida (art. 54). Los practicantes ejercen como ayudantes de los médicos titulares y de los médicos de partos (art. 100).

<sup>7</sup> La lucha antituberculosa en España, Blanco Rodríguez (1967).

<sup>8</sup> Ibidem.

Fraser Brockington. Informe sobre la organización de los servicios sanitarios en España, 1967. © World Health Organization, 1967. Traducido del francés por Esteban Rodríguez Ocaña © Universidad de Granada, 2018 11

El Jefe provincial carece de un segundo que le asista, ni en el plano de la administración de Salud ni en el de los consultorios de especialidad. Deberían nombrarse, en función de las necesidades, médicos superiores responsables, con dedicación exclusiva, así como ingenieros sanitarios para la higiene medioambiental.

#### 4.2.3 Falta de trabajadores de campo

La estructura existente padece, de forma generalizada, de la falta de trabajadores de nivel inferior al de médico generalista, es decir personal para 1) saneamiento, 2) cuidados de enfermería y 3) servicio social.

##### 4.2.3.1 Vigilancia medioambiental

El jefe provincial y el Jefe local no pueden por sí solos controlar de forma apropiada la higiene ambiental y de la vivienda, el agua, el alcantarillado, la atmósfera, los alimentos, los procesos industriales, etc. Por otro lado, la falta de código sanitario pareciera indicar que no se espera que lo hagan. Las pocas funciones de vigilancia existentes se reparten entre las manos de un gran número de otros departamentos gubernamentales. El hecho de que los servicios provinciales sanitarios se ocupen de cobrar tasas en lugar de proceder a las inspecciones de higiene, hace sin duda más mal que bien en la medida en que puede llevar a pensar que dichos servicios no tienen más objeto que recaudar dinero. La falta generalizada de control del medio tiene una influencia nefasta sobre el cuadro epidemiológico; por otro lado, los servicios sanitarios pierden aquí una excelente ocasión de intervenir sobre las lacras que producen las enfermedades.

De manera general, el control del medio se limita a alimentos y agua, el primero se reparte entre veterinarios y farmacéuticos según que el origen del alimento sea o no animal. El sistema de tasas, que impone a las empresas el correr con los gastos de las inspecciones, ayuda a financiar los servicios actuales; pero apenas remedia las deficiencias higiénicas, salvo, tal vez, en las piscinas.

Resulta una necesidad evidente la creación de inspectores sanitarios, bajo cualquier denominación o forma, en una proporción de uno por cada 10.000 habitantes. Como ha dicho el Profesor García Orcoyen, Director General de Sanidad: “es el *agente sanitario* del que carecemos en España y que es indispensable crear”.<sup>9</sup>

Una dotación apropiada para todos los escalones del servicio de higiene del medio ambiente exige ingenieros de Salud Pública cualificados, con distintas especializaciones, e inspectores sanitarios formados en concordancia con sus obligaciones de ejercicio. Para poder contar con agentes competentes, dichas funciones deberían repartirse entre dos niveles de personal técnico, uno intermedio y otro inferior.

##### 4.2.3.2 Servicios de Enfermería de Salud Pública

Los avances actuales de la Medicina Social necesitan una estructura reforzada mediante enfermeras, encargadas: a) de enseñar los principios higiénicos y de ocuparse los problemas sociales y b) de la prestación de cuidados a domicilio. No sería irracional ponerse como objetivo la consecución de una proporción de una enfermera por cada 5.000 habitantes. En los distritos rurales existiría la ventaja de que la enfermera de Salud Pública combina las funciones de visitadora con la de cuidados domiciliarios. En la ciudades sería más cómodo separar ambos servicios.

---

<sup>9</sup> Noticias médicas, 6 abril 1967, 1: 14.

El trabajo de la enfermera visitadora debería ser polivalente, es decir referido al conjunto de problemas (sociales, epidemiológicos, educativos) que necesitan las visitas a domicilio. Su trabajo estaría relacionado con lo que se llama en España luchas sanitarias, incluida la acción antituberculosa, contra la lepra y el tracoma, con los problemas sociales que enfrenta el médico de pueblo en su práctica diaria, con la educación sanitaria, con las vacunaciones y con el trabajo social que exigen los programas modernos de salud mental.

Los cuidados a domicilio realizados por la enfermera deberían constituir una alternativa al ingreso hospitalario, es decir, ser cuidados de enfermería en el sentido moderno del término y no los que prestan en la actualidad los practicantes. Deberían desplegarse todos los esfuerzos para desarrollar este tipo de servicio en paralelo a la expansión del creciente sistema hospitalario. El aumento excesivo de los hospitales tiene sus propios inconvenientes, tanto desde el punto de vista económico como social, así que desde el principio hay que procurar evitarlo.

Los servicios de la enfermera de Salud Pública, tal como los acabo de describir, faltan casi totalmente, salvo a nivel administrativo. El practicante, como se ha indicado antes, no asume sus funciones ni como enfermero visitador ni como enfermero de cuidados domiciliarios. De tal modo que no se aprovechan las ricas posibilidades que tiene la medicina social práctica. Médicos, veterinarios y farmacéuticos, cada uno en sus competencias, han contribuido a la educación sanitaria como los demuestran los considerables avances en la comprensión de los problemas de salud por parte de la población. Lo que no obsta para que pudiera hacerse mucho más, llevando la enseñanza de los principios de la higiene doméstica a las consultas externas. Por ejemplo, en el terreno de la salud mental, apenas se hace nada fuera del medio hospitalario.

La creación de un cuerpo de enfermeras de Salud Pública que, bien combinen las labores de enfermeras visitadoras y enfermeras de cuidados domiciliarios o bien ejerzan por separado ambas funciones, enfrenta considerables dificultades, que se pueden resumir del siguiente modo:

- a) El sistema administrativo actual reposa en gran parte sobre el principio de una administración vertical. Los servicios que se administran desde Madrid tienen la tendencia a generar sus propios trabajadores sociales; por ejemplo, el Patronato antituberculoso prepara y especializa a enfermeras para trabajar sobre el terreno.
- b) Dado el elevado nivel profesional del personal en primera línea, no hay lugar para la enfermera en el organigrama actual, vistas la competencia y el gasto. Así con frecuencia se aduce que es preferible contratar a un médico suplementario antes que a una enfermera.
- c) La existencia de enfermeros que trabajan como ayudantes de médico y también por su cuenta en la esfera privada constituye una complicación. La tradición profesional de los practicantes actúa en contra de la posibilidad de emplearlos en los distritos rurales tanto como visitadores o como enfermeros a domicilio. Pero al menos en el medio urbano se les podría tomar en consideración para esta tarea.

Estas dificultades no son insuperables. Si hasta la fecha no se ha podido implementar un servicio de enfermería de Salud Pública hay que culpar a la falta de voluntad. Con la admisión de 25 alumnos o menos al año, que admite la Escuela de enfermería de Salud Pública de Madrid, no puede esperarse un cambio ni hoy ni mañana. Estas dificultades sirven para subrayar la necesidad de crear una zona de demostración que pueda ser tomada como modelo para ilustrar el trabajo de campo de la enfermería de Salud Pública.

#### 4.2.4 Ausencia de Código sanitario

Para el control del medio ambiente resulta indispensable la existencia de un Código sanitario que precise con detalle las normas a seguir, los procedimientos para remediar las deficiencias y las sanciones que sean de aplicación en su caso. Este código es actualmente inexistente. Se impone establecer un reglamento para todo lo que tiene que ver con la inspección, los informes, la prevención y las medidas correctoras, en el sentido siguiente:

- a) establecer como obligatoria para los agentes sanitarios dependientes del Jefe provincial las tareas de inspección;

- b) definir lo que se entiende por nocivo o insalubre;
  - c) dar autoridad a los avisos oficiosos que exijan la corrección inmediata de los supuestos nocivos;
  - d) establecer un procedimiento elemental de sanciones;
  - e) establecer una lista de criterios mínimos para definir la salubridad de las viviendas;
  - f) obligar al Jefe provincial a la inspección de las viviendas, hacer un informe anual de situación y señalar como objeto de arreglo, cierre o demolición aquellas que son impropias para la ocupación humana;
  - g) definir los poderes concedidos al alcalde en lo que se refiere a la preparación de planes de trabajo para volver habitables los alojamientos insalubres a precio razonable y, en determinadas circunstancias bien definidas, para prohibir la ocupación de viviendas insalubres o para ordenar su destrucción;
  - h) preparar medidas contra la contaminación atmosférica, etc.
- Por otra parte, convendría preparar legislación para reglamentar los aspectos siguientes:
- i) diseño, construcción, operación y mantenimiento de las obras destinadas a producir modificaciones importantes del medio en interés de la salud;
  - j) actividades que fomenten las iniciativas personales, educativas y de estímulos del interés general a favor de una mejora general del saneamiento.

#### 4.2.5 Abuso del empleo a tiempo parcial

El sistema actual, que consiste en el empleo a tiempo parcial de un elevado número de médicos, veterinarios, farmacéuticos, practicantes y matronas presenta la ventaja de que una gran parte de la fuerza profesional encargada de la práctica clínica se encuentra así dotada de participación en la acción de la Salud Pública local; sólo con agregar agentes sanitarios y enfermeras de salud pública con dedicación exclusiva todo funcionaría mucho más eficazmente. Sin embargo, es tiempo de revisar este sistema. En la mayoría de las provincias bastaría con contratar 4 ó 5 veterinarios a tiempo completo en lugar de los numerosísimos que hoy trabajan a tiempo parcial. Al mismo tiempo, la creación de plazas para médicos (salubristas) de distrito en todas las provincias cuya población supere los 200.000 habitantes permitiría obtener mayor eficacia que bajo la forma actual en que un Jefe provincial tiene relación directa con 200 o más médicos titulares a tiempo parcial.

#### 4.2.6 Insuficiente enseñanza de Salud Pública

En un país donde tanto uso se hace del práctico generalista para las intervenciones salubristas, el nivel de la enseñanza debería ser muy elevado, lo que no es ciertamente el caso con los planes de estudio actuales. En particular, la enseñanza de la Medicina Social brilla por su ausencia. Todavía no existen cátedras de esta materia en las Universidades. En el siguiente capítulo trataremos el problema de la formación del personal.

### 5. FORMACIÓN DEL PERSONAL DE SALUD PUBLICA

#### 5.1. Formación en Medicina

##### 5.1.1. Enseñanza universitaria

El éxito de la acción sanitaria depende en gran medida de la voluntad y la aptitud de los médicos para aplicar en su trabajo los principios de la Medicina Social y Preventiva; de donde se colige que la enseñanza médica debe inculcar no solamente una actitud clínica sino la orientación hacia la colectividad. Dicho de otro modo, la formación de los estudiantes de medicina debe constituir la primera piedra en la constitución del Servicio de Salud Pública. La enseñanza de la Medicina Social y Preventiva a los estudiantes se encuentra aún en estado experimental en

algunos países<sup>10</sup>; en el caso español, la tarea está por acometer y exigirá tanta energía como atrevimiento.

### 5.1.2 Enseñanza post-universitaria

Es preciso que un número suficiente de médicos pueda completar su formación mediante cursos de posgrado para estar preparados para administrar los servicios, del hospital o entre la población, en el nivel central o en la periferia.

La enseñanza postuniversitaria se concentra casi con exclusividad en la Escuela Nacional de Sanidad en Madrid, creada por la Ley de Bases, donde se establecía: que el centro dependería del Ministerio de la Gobernación; que se incorporaría a la universidad cumpliendo la legislación universitaria; que enseñaría Higiene a médicos, veterinarios, farmacéuticos, personal auxiliar y agentes de saneamiento; que se asociaría con Escuelas de Puericultura y Educación sanitaria; y que estaría bajo el control de un Patronato, formado por representantes de los Ministerios de Educación y Gobernación, de la Universidad y de la DGS, actuando como Secretario el propio Director del Centro.

En la escuela central, las enseñanzas se han concentrado en los profesionales y no han incluido a los auxiliares y agentes de saneamiento. El Patronato no se ha reunido propiamente nunca, de tal manera que no ha aprovechado las ventajas del diálogo para comprender y resolver las dificultades. Incluso da la impresión de que no se ha sabido muy bien nunca a quien correspondía el derecho a hacer la convocatoria.

La Escuela de Sanidad ha hecho mucho por España, formando cientos o miles de diplomados, a través de los Cursos de Diplomados en Sanidad y los Cursos de Oficiales Sanitarios.

Sin embargo, esta osada tarea ha resbalado a causa de la infradotación en personal, un pecado de nacimiento. La Escuela ha calcado su sistema de dotación del modelo universitario, es decir que emplea profesores polivalentes a tiempo parcial, para los cuales el trabajo universitario mal remunerado resulta ser sólo un complemento de otros empleos exteriores mejor pagados. El Director de la Escuela, aunque de rango superior, generalmente catedrático universitario, no ha consagrado más que una parte de su tiempo a la administración del Centro y a la enseñanza en el establecimiento. Esta insuficiencia en materia de personal explica sin duda y hasta cierto punto el hecho de que la entrada en el Cuerpo de Sanidad Nacional se efectúe a través de un examen independiente de la Escuela, sin que ni siquiera sea preciso que lo haga ella. Esto ha hecho que en los últimos años la escasez de personal haya constituido un escollo con el que ha chocado la Escuela y hace poco probable que pueda salvarse si no se superan dichas dificultades. Como mínimo sería precio contar con un Director con dedicación exclusiva, en el sentido de que dedicara todo el tiempo a la docencia, la investigación y la administración de la Escuela; docencia que podría incluso extenderse a los estudiantes de Medicina.

La enseñanza que se imparte en la Escuela Nacional de Madrid sigue centrada en la Microbiología, mientras que la Epidemiología se explica como una interpretación de aquella. La Epidemiología en sentido amplio, es decir, el estudio en la comunidad de los fenómenos asociados a las enfermedades, infecciosas o no, apenas si se toca. Con apoyo de la OMS, en 1964 se creó un Departamento de Bioestadística, con fines docentes y de investigación. El candidato a la dirección del Departamento obtuvo una beca para realizar estudios especializados

<sup>10</sup> Organización Mundial de la Salud, 1965. Simposio europeo sobre la enseñanza de la Medicina Preventiva en las Facultades de Medicina. Nancy (22 - 30 julio 1964) [publicado como WHO Regional Office for Europe (1965) The teaching of the preventive aspects of medicine in medical schools in Europe. Copenhagen (document Euro-279). *Nota del editor*].

en Chile y se le suministró material docente. Por desgracia, este Departamento no ha funcionado nunca.

La Epidemiología se inspira de forma importante en la Sociología, por lo que corresponde a la división de los grupos humanos, y en la Estadística, por lo que concierne a su metodología; a la vez, utiliza todos los datos médicos que convienen a las cuestiones de que trata. La línea de separación entre la Sociología médica (que recurre a la Epidemiología) y la Epidemiología (que se apoya en la Sociología) no está siempre clara. El estudio del cuadro de la enfermedad conlleva necesariamente la toma en consideración del comportamiento humano, de la misma manera que el estudio del comportamiento exige el examen de los cuadros mórbidos. En toda Europa, incluida España, la Salud Pública se ha alejado de la era de dominancia de lo bacteriológico y ha entrado en una era sociológica, en la que las ciencias del comportamiento humano constituyen una parte importante de la formación especializada.

Existe un tercer capítulo que debe estar estrechamente asociado a la enseñanza, a saber, la “teoría y práctica de la administración y del gobierno”. Hay que enseñar al administrador médico a organizar unos servicios apropiado y eficaces en el contexto de un determinado cuadro nosológico; a calcular las consecuencias de las diversas opciones y reconocer los factores limitantes en cada situación dada; a comprender las relaciones entre el hospital, la Salud Pública y la práctica clínica generalista y el modo como cambian de un país a otro; a saber utilizar a los agentes sociales y a los expertos no médicos; y a conocer la teoría de la gestión.

Los cursos oficiales que se imparten en la actualidad en la Escuela Nacional de Sanidad deberían adaptarse a las necesidades modernas. Una forma conveniente sería establecer un programa nacional para el Curso de Oficiales Sanitarios, sometido a la inspección y supervisión de la DGS.

Todas las indicaciones necesarias figuran, por ejemplo, en el informe final del “Simposio sobre formación del médico de Salud Pública en relación con su tarea en la colectividad”, organizado por la Oficina Regional de la OMS para Europa, en Lisboa, en 1966.<sup>11</sup>

Si bien el médico salubrista tiene necesidad de saber Microbiología, su enseñanza debería formar parte de la Epidemiología de las enfermedades infecciosas y reducirse al mínimo para permitir un ampliación de otros terrenos.

La formación en laboratorio debería reducirse básicamente a demostraciones. Para los médicos, la Química y las prácticas de Química deberían suprimirse.

Estas materias podrían estudiarse durante un periodo de seis meses en el curso común para todos los estudiantes, y tres meses más para algunas especialidades, por ejemplo gestión hospitalaria, estadística, primeros auxilios o educación sanitaria.

Si se desea preparar un programa de enseñanza tan amplio es esencial asegurarse la participación de distintas facultades, médicas o no, de la Universidad.

El Curso de Diplomados en Sanidad se mantendrá con modificaciones. Sirve para formar a los médicos, veterinarios y farmacéuticos que trabajan en este campo. Es importante. En realidad compensa, al menos para los médicos, el fracaso de la Facultad de Medicina en la enseñanza de la Medicina Social y Preventiva, lo que en sí mismo constituye un grave defecto. Convendría que la Facultad se replantea esta importante cuestión. Es recomendable que se nombre un catedrático de Medicina Social y Preventiva con dedicación exclusiva para organizar la enseñanza universitaria.

Esta reorganización exige que se adapte a sus necesidades particulares la formación que se da a los tres grupos profesionales (médicos, veterinarios y farmacéuticos).

El Director con dedicación exclusiva de la Escuela Nacional de Sanidad debería ser el responsable tanto de la enseñanza de grado como del posgrado. Enseñaría la Medicina Social y Preventiva (es decir, una concepción global de los problemas de salud de la colectividad así como de la enfermedad individual en su contexto social, más que como una derivación de la

<sup>11</sup> EURO 0337 Simposio sobre la formación del médico de salud pública para el desempeño de sus funciones en la colectividad, Lisboa (14 - 18 feb. 1966), publicado como WHO Regional Office for Europe (1966). The education of the public health physician in relation to his work in the community, Copenhagen (document Euro-337). *Nota del editor.*

Microbiología) y podría estar asistido por un agregado o adjunto a tiempo completo y por varios ayudantes también con dedicación exclusiva.

Este profesor a tiempo completo podría 1) modernizar la enseñanza del Curso de Oficiales Sanitarios en Madrid y 2) introducir la enseñanza de la Medicina Social y Preventiva en el plan de estudios de todas las Facultades de Medicina.

Las dificultades que afronta en la actualidad la Escuela Nacional de Sanidad refuerzan la necesidad de establecer más escuelas en la periferia. La existencia de una única escuela en un país del tamaño de España crea problemas de diversos órdenes: tamaño de los grupos, coste de la matrícula a cargo de los estudiantes, limitación de las posibilidades de enseñanza, distancia a recorrer. Aparte de otras consideraciones, el que sólo haya una única escuela limita por encima de todo las posibilidades de ingreso y agudiza las dificultades que encuentra la administración sanitaria para reclutar a un porcentaje razonable de los licenciados más brillantes.

Sería recomendable la creación de una o varias Escuelas de Sanidad en provincias, bajo un único programa nacional o ni siquiera, las cuales mantendrían las mismas relaciones con sus universidades locales, dirigidas por un catedrático de Medicina Social y Preventiva a tiempo completo que compaginara la dirección de la Escuela y la enseñanza a los alumnos y licenciados.

Siendo las normas sobre personal una de las principales razones del fracaso relativo de la enseñanza de la Salud Pública, también hay que considerar las relaciones actuales entre la Escuela Nacional de Sanidad y la Universidad de Madrid. Esta debería de servir para mantener altos estándares académicos, coordinar la enseñanza de pre y posgrado de la Medicina Social y Preventiva, estimular la investigación como necesario en una materia en vías de evolución, y para facilitar la participación de distintas facultades en la enseñanza de posgrado. Por lo que respecta a este último aspecto, la relación de la ENS con la Universidad incrementa su importancia en la medida en que desborda el marco de la Facultad de Medicina.

El Patronato que, según la reglamentación, debe gestionar la ENS constituiría un medio para el estudio y la resolución de los problemas vitales que lastran la Escuela. A este respecto, los legisladores de 1944 estarían decepcionados si viesen que la ENS se enfrenta a dificultades que hubieran podido evitarse mediante los consejos del órgano de gestión previsto donde encuentran representación los varios intereses.

El Patronato debería reunirse periódicamente, con plazos fijados, e informar directamente a los órganos representativos. Dicha convocatoria podría incumbir al Decano de la Facultad de Medicina o a un presidente que se designara.

### 5.1.3 Proyecto universitario piloto en Medicina Social y Preventiva

El futuro de España depende hasta tal punto de la puesta en marcha de una enseñanza sólida de la Medicina Social y Preventiva a niveles universitario y pos-universitario que conviene desde ahora mismo afrontar seriamente la creación de una cátedra experimental de Medicina Social y Preventiva en una universidad pública de provincias. Esta cátedra se haría responsable de 1) impartir enseñanza a los estudiantes de Medicina a lo largo de su carrera; 2) organizar un Curso de Oficiales Sanitarios siguiendo los modernos principios ya indicados; 3) organizar cursos de Enfermería de Salud Pública.

Entre esta nueva cátedra y la Jefatura Provincial de Sanidad deberían establecerse lazos estrechos; por ejemplo, la enseñanza de la Estadística sería realizada por una persona con puesto en ambas instituciones como profesor adjunto en Estadística médica y, a la vez, responsable del Departamento de Estadística y Epidemiología de la Jefatura Provincial.

Varias universidades españolas se prestarían convenientemente a tal empresa, como Pamplona y Cádiz, donde un profesor ya se ha beneficiado de una beca de la OMS.

### 5.2 Formación en Estadística sanitaria

Para asegurar el análisis estadístico son necesarias dos categorías de personal. Hará falta un número relativamente pequeño de diplomados universitarios, que se prepararán en una escuela de posgrado, presumiblemente en Madrid. Esto, como ya ha sido sugerido por la OMS,



se podría hacer sobre la base de nombrar a un médico estadístico a tiempo completo en la DGS para organizar el Departamento Central de Estadística y Epidemiología, quien a la vez ocuparía un puesto docente en Bioestadística en la ENS, sección creada en 1964 con ayuda de la OMS, para formar a los diplomados universitarios en la materia. El Departamento de Estadística se ocuparía de formar a médicos y otros licenciados dentro de los cursos de Salud Pública. Si se reorganizara el Curso de Oficiales Sanitarios en el sentido ya indicado, estos estadísticos superiores podrían ser licenciados en Medicina que hubieran obtenido una especialización en estadística.

Un mucho mayor número de ayudantes serían necesarios para dotar las secciones de estadística de las Jefaturas provinciales. Se les reclutaría al acabar su bachillerato y deberían seguir un curso de menor duración y naturaleza más técnica. Sería conveniente que esta enseñanza se suministrara de forma descentralizada, en las ciudades universitarias de provincias, de donde se podría conseguir el profesorado. El estadístico médico mencionado más arriba sería el encargado de vigilar o supervisar en general todos los cursos de formación.

### 5.3 Formación en Enfermería de Salud Pública

La actual formación en Enfermería de Salud Pública, que se desarrolla en Madrid bajo la dirección de la Escuela Nacional de Sanidad, deberá ser desarrollada considerablemente si se desea reforzar el servicio de enfermería de campo con un número suficiente de enfermeras.

Esta posibilidad se ve muy limitada con los medios actuales.

El camino más eficaz sería crear nuevas escuelas de Salud Pública para enfermeras en otras ciudades universitarias.

Igualmente, los enfermeros podrían incorporarse a esta modalidad de trabajo para garantizar una actividad a tiempo completo entre la población, bien como enfermeros visitantes, como enfermeros de cuidados clásicos o desempeñando ambas funciones.

### 5.4 La formación de Agentes sanitarios

La preparación de agentes sanitarios ha sido objeto de numerosos debates en España desde la publicación del Plan de Actividades Sanitarias (ministerio de la Gobernación, 1965) y se han apuntado diversas propuestas. Se trataría de formar a un personal encargado de aplicar los principios de la Salud Pública a los problemas del medio ambiente, sin necesidad de poseer un dominio profundo de las ciencias en las que se basan las distintas técnicas, en el bien entendido de que estas serían potestad del ingeniero sanitario. La enseñanza que recibiría este personal subalterno podría versar sobre los siguientes aspectos:

- bases de la legislación sanitaria;
- microbiología y parasitología aplicadas a la higiene del medio;
- aspectos físicos del hábitat humano;
- higiene de los alimentos;
- abastecimiento de agua;
- canalizaciones, evacuación de aguas sucias y sistema de alcantarillado;
- evacuación de residuos sólidos;
- contaminación del agua;
- contaminación atmosférica y supresión de humos;
- lucha contra insectos y roedores.

Teniendo en cuenta estos imperativos, no parece posible el recurso a profesionales de entre los existentes. Pese a lo que se dice, el practicante, en tanto que ayudante de médico, no sería adecuado para esta tarea tras haber pasado tres años de estudios en enfermería y teniendo la perspectiva de compaginar su trabajo público con una práctica privada.

No se debería iniciar ninguna actividad formativa antes de que existieran los puestos suficientes en provincias para que fuesen cubiertos por los nuevos diplomados.

### 5.5 Instituto técnico de Sanidad

El fracaso de la Escuela Nacional de Sanidad en lo que respecta a la formación y a la investigación en Salud Pública, así como la necesidad actual de ampliar el abanico de personal auxiliar, llevan a postular a algunos la conveniencia de establecer un Instituto Nacional de Sanidad, el cual, sin relación con la Universidad, asumiría estas funciones con independencia de la Escuela actual.

Se tendría la ventaja de que un organismo central gubernativo podría nombrar al personal docente a tiempo completo sin respetar las reglas y costumbres universitarias. Desde este punto de vista, el sistema daría un empujón instantáneo a la educación básica de estos profesionales y auxiliares y tendría excelentes posibilidades de mantener cursos de reciclaje.

No obstante y más allá del coste económico de la aventura de crear otra estructura paralela a la existente, se le pueden presentar algunas objeciones. Por lo pronto, sería preferible que la formación de auxiliares como agentes sanitarios y ayudantes estadísticos, por ejemplo, se hiciera por mediación de las Jefaturas provinciales y no esencialmente en Madrid. En esta misma línea, el mejor modo de satisfacer las necesidades en enfermería de Salud Pública sería el establecimiento de nuevas escuelas en provincias.

En segundo lugar, sería preferible que la enseñanza de posgrado de los profesionales en Salud Pública fuese llevada a cabo en alianza estrecha con la Universidad. De este modo, los profesores de materias de especialización obtendrían un beneficio al dispensar sus enseñanzas a estudiantes y diplomados. El Director, en tanto que profesor de universidad, tiene acceso a los círculos universitarios y facilidad para captar a otros colegas médicos y no médicos que amplíen lo máximo posible la base docente de la Salud Pública.

En tercer lugar, sería posible revertir la trayectoria de la Escuela actual, nombrando personal docente a tiempo completo.

En cuarto lugar, la DGS podría, de acuerdo con el Director, establecer cursos de reciclaje para las materias que se imparten actualmente en la Escuela.

En síntesis, la Escuela Nacional de Sanidad se ha establecido como el instituto nacional encargado de la enseñanza, la investigación y el consejo técnico a las Jefaturas provinciales para el conjunto del país. Su constitución es válida, fundamentalmente, y sería preferible solucionar los problemas actuales que buscar una solución paralela.

## 5.6 La zona de demostración

Mucho de lo que se lleva dicho en este Informe sustenta la necesidad de crear una Zona de Demostración según los principios contenidos en el segundo Anteproyecto del Plan de Operaciones preparado por la Oficina regional de la OMS (5.1.67)<sup>12</sup>.

Esta zona serviría de banco de pruebas para el desarrollo estructural sobre una base más amplia y bajo la autoridad delegada en el "Jefe" de la misma. Constituiría un lugar para la formación práctica en Salud Pública al que podrían acudir médicos, veterinarios, farmacéuticos, enfermeras, agentes sanitarios, estadísticos y trabajadores sociales una vez recibido cursos teóricos en distintos lugares del país. Sería el medio de estudiar y experimentar una nueva ley sanitaria que diera al Jefe, a su personal y a los agentes sanitarios, un poder real para intervenir en la mejora de la higiene ambiental.

La zona de demostración es un instrumento para disminuir los obstáculos al cambio que opone todo sistema establecido de larga duración.

Escoger Talavera de la Reina como zona de demostración es una elección juiciosa, por las razones enumeradas en el segundo Anteproyecto. Es preciso ahora construir un hospital en Talavera, así como un centro que agrupe a los servicios administrativos y técnicos de la zona. Incluirá también una residencia estudiantil para quienes sigan formación de posgrado, cursos de reciclaje u otros.

---

<sup>12</sup> Ver también el informe final del Seminario sobre las zonas de demostración e investigación en Salud Pública, Le Vésinet, 20-23 marzo 1963 (EURO 251).

El Director de la zona, como se especifica en el Segundo Anteproyecto, dependerá directamente del Director General de Sanidad, a través del Subdirector de Medicina Preventiva y de Asistencia. Esta disposición debe cumplirse al pie de la letra. Como quiera que puede crear tensiones en el sistema administrativo actual respecto de la Jefatura provincial correspondiente, deberá considerarse, en cuanto sea posible, la ampliación de la zona hasta cubrir la totalidad de la provincia de Toledo, tal y como se recomienda en el segundo Anteproyecto.

Resulta esencial integrar en el sistema al Ambulatorio de Talavera, teniendo en cuenta la importancia que se da en la actualidad a la fusión entre medicina preventiva y curativa, en especial en el campo de la medicina general. Los servicios preventivos que prestan una y otra parte deberán fusionarse, racionalizarse y funcionar al unísono.

Uno de los mayores obstáculos a la realización de este proyecto durante los últimos cuatro años ha sido la dificultad de encontrar a un médico con la formación y aptitudes necesarias, que aceptara los inconvenientes de vivir en Talavera. Con independencia de quien sea el candidato, la decisión final descansará sobre el deseo de servir y ninguna otra situación en España garantiza hoy mayor satisfacción a este respecto. De todas formas, habría que ofrecer alguna posibilidad de promoción futura en el servicio público. Dos vías se abren para hacer frente a este problema: 1) promoción a nivel de la administración superior y 2) promoción universitaria. Convendría, pues, sopesar la posibilidad de conceder al médico responsable de Talavera al menos el rango de Jefe provincial adjunto de la provincia de Toledo, así como un puesto relevante en la Escuela de Sanidad o en la Facultad de Medicina o en ambas.

Una vez que la zona esté funcionando, se podría impartir enseñanza práctica a los estudiantes de medicina. Generalistas de la zona, con base en el ambulatorio y versados sobre las doctrinas de la medicina social, podrían ser escogidos para reforzar esta enseñanza. Dichos generalistas podrían realizar un cursillo de formación didáctica médica en un centro sanitario de enseñanza como el de Manchester.

La zona englobaría la totalidad de las actividades de Salud Pública, por lo que podría ser empleada como plataforma para proyectos piloto en materias diversas: higiene mental, educación sanitaria, rehabilitación, etc.

Permitiría que se ampliara el campo de actuación de las enfermeras visitadoras cuya creación se ha sugerido, de modo que se convirtieran en trabajadoras sanitarias familiares polivalentes, que se ocuparían de la higiene mental, del trabajo social para los generalistas, de la tuberculosis, etc.

Dada la necesidad de combinar las actuaciones de la DGS y de la Seguridad Social, ambos departamentos deberían estar plenamente representados en el comité consultivo de la zona de demostración.

## 6. RECOMENDACIONES

Conforme avanzaba este estudio veía más claramente la necesidad de una reorganización general de la administración y de la enseñanza. Las razones que lo justifican se encuentran en este Informe. Las recomendaciones que vienen a continuación indican brevemente las indicaciones sugeridas al Gobierno de España.

### 6.1 Reorganización de la administración sanitaria

#### 6.1.1 Nivel central

6.1.1.1 Elaborar una nueva ley de Sanidad que consolide y amplíe la legislación que emana de la Ley de Bases de 1944.

6.1.1.2 Reorganizar las funciones de los departamentos sanitarios centrales y periféricos, bien a través de la nueva ley o por otro medio. Las funciones centrales incluirían la formulación de directivas, la confección del presupuesto, los servicios especializados de consulta, la inspección general; las misiones periféricas serían las del Jefe provincial, quien se ocuparía de todos los detalles de las actividades ordinarias.

6.1.1.3 Fusionar las dos organizaciones de salud principales que existen en el país, a saber, la Dirección General de Sanidad y la Seguridad Social.

6.1.1.4 Nombrar un médico estadístico que se haría cargo de a) un departamento central de estadística en la Dirección General y de b) la enseñanza de la Bioestadística en la Escuela Nacional de Sanidad y la Facultad de Medicina.

6.1.1.5 Reorganizar los servicios de laboratorio sobre una base nacional, a través de la designación de un director nacional que ejercería su autoridad a partir de un laboratorio central y creando laboratorios periféricos unificados (especializados en función de las necesidades) en las distintas Jefaturas provinciales.

6.1.1.6 Nombrar a uno o varios ingenieros sanitarios en la Dirección General de Sanidad con vistas a crear y desarrollar un servicio de higiene del medio.

## 6.1.2 Nivel provincial

6.1.2.1 Delegar en los Jefes provinciales todas las competencias que les permitan ejercer como médico-jefe responsable de la salud de cada provincia.

6.1.2.2 Crear en cada jefatura provincial secciones encargadas de los distintos aspectos de la Salud Pública (estadísticas, enfermedades transmisibles, higiene ambiental, servicios de laboratorio, enfermería, etc.) dirigidos por personal convenientemente cualificado.

6.1.2.3 Entre dichas secciones serían más urgentes las de estadística, bajo la dirección de un médico con formación estadística (por ejemplo, podría crearse tal especialidad dentro del Curso de Oficiales Sanitarios). El puesto de jefe de sección se podría unir al de jefe-adjunto provincial y tener asignados ayudantes de estadística.

6.1.2.4 Examinar inmediatamente el solapamiento de funciones entre los ambulatorios de la Seguridad Social y los Institutos de Sanidad de las capitales de provincia para reagruparlas donde sea posible.

6.1.2.5 El párrafo 6.1.1.2 también es de aplicación a este nivel.

## 6.2 Formación del personal

6.2.1 La Escuela de Salud Pública de Madrid debería estar dirigida por un catedrático de Medicina Social y Preventiva o de Salud Pública, con dedicación exclusiva, secundado por profesores adjuntos con la misma dedicación.

El Patronato director de la Escuela Nacional de Sanidad debería ser establecido sobre bases sólidas y responsabilidades bien definidas respecto a la convocatoria de sus reuniones y la emisión de informes ante los organismos representativos.

6.2.2 En una o varias universidades de provincias se deberían crear escuelas de Salud Pública dirigidas por catedráticos de Medicina Social y Preventiva o de Salud Pública, con dedicación a tiempo completo.

Una cátedra experimental a tiempo completo podría crearse en alguna de dichas universidades, con el fin de incluir una zona de formación práctica de campo en la provincia. Esta nueva cátedra podría a) organizar la enseñanza de la Medicina Social y Preventiva a los estudiantes de Medicina, b) organizar un Curso de Oficiales Sanitarios según principios actuales y c) organizar una Escuela de Salud Pública para enfermeras.

6.2.3 El Curso de Oficiales Sanitarios debería reformarse según los principios modernos y recurrir a Facultades médicas y no médicas para la enseñanza de las materias apropiadas. El objetivo de esta enseñanza sería formar a médicos administradores con distintas especializaciones que le permitan hacerse cargo de los varios puestos administrativos de los servicios de salud.

6.2.4 La creación de una Zona de demostración en Talavera debería realizarse lo antes posible y su director debería ostentar el rango de, al menos, Jefe provincial adjunto de Toledo, o desempeñar una función docente en la Universidad. La actuación de la zona cubriría todos los

Fraser Brockington. Informe sobre la organización de los servicios sanitarios en España, 1967. © World Health Organization, 1967. Traducido del francés por Esteban Rodríguez Ocaña © Universidad de Granada, 2018 21

aspectos de la Salud Pública. Englobaría al ambulatorio en el marco de un programa coordinado con la Seguridad Social.

6.2.5 Convendría organizar la formación de agentes sanitarios en un servicio provincial de Sanidad escogido expresamente, con vistas a generar un programa que pudiera ser de aplicación nacional. Antes de comenzar el primer curso se enviarían monitores para obtener la formación necesaria. Conforme se fuese formando personal, se podrían ir abriendo nuevas escuelas.

6.2.6 Convendría organizar una escuela para ayudantes estadísticos, con un programa de base nacional, en un servicio provincial de Sanidad bien escogido.

6.2.7 Estas actividades formativas irán acompañadas de la creación de los puestos correspondientes, como auxiliares estadísticos y agentes sanitarios, a fin de que todo el personal formado pueda obtener un empleo.

## **7. SUGERENCIAS SOBRE LA AYUDA ACTUAL Y FUTURA POR PARTE DE LA OMS**

Sería recomendable que la Organización, dentro de los límites de sus disponibilidades presupuestarias, ofreciera:

7.1. Consejo para elaborar una nueva Ley de Sanidad destinada a reemplazar y a consolidar la legislación actual.

7.2 Consejo para reorganizar las Jefaturas de Sanidad provinciales (legislación, administración, etc.).

7.3. Becas de estudio para preparar una candidatura al empleo de jefe del departamento estadístico sanitario de la Dirección General de Sanidad, el cual tendría igualmente la responsabilidad de organizar y dirigir un departamento de Estadística en la Escuela Nacional de Sanidad.

7.4 Una beca de un año en los servicios apropiados de uno o varios países a quienes ocupen los dos puestos siguientes:

a) Catedrático de Medicina Social y Preventiva a tiempo completo, de la Universidad de Barcelona, Granada, Pamplona, Cádiz u otra, para organizar la enseñanza de la Medicina Social y Preventiva destinada a estudiantes universitarios, médicos diplomados y enfermeras.

b) Director de la zona de demostración. La estancia de estudio podría ser de un año y tener lugar en el Departamento de Medicina Social y Preventiva de Cali (Colombia) o en otro lugar.

7.5 Visitas de consultores para la organización y desarrollo de la higiene ambiental, en especial la formación de ingenieros sanitarios y técnicos sanitarios y conceder becas de estudio en esta materia.

7.6 Envío de una consultora en enfermería de Salud Pública para estudiar la creación de nuevas escuelas de enfermería de Salud Pública asociadas a los centros provinciales de enseñanza de la enfermería.

7.7 Consejo para organizar un servicio nacional de laboratorio de Salud Pública a través de la visita de un consultor.

7.8 Apoyo para la creación urgente de una Zona de Demostración.

7.9 Garantías para la formación en Medicina Social de los médicos generalistas empleados en el ambulatorio de Talavera (uno de pediatría y otro de medicina general). Esta formación podría alcanzarse en el Centro de enseñanza sanitaria de Manchester.
